# Supplementary material
Source: publisher figshare collection journal article supplement (https://tandf.figshare.com/ndownloader/files/14003513)
Supplement: Supplementary file 1 [file 14003513]

| Supplemental Table 1. Proportion of loss to follow-up, separated by early daycare attendance status in each follow-up period (N = 43,783) | | | | | | |
| --- | --- | --- | --- | --- | --- | --- |
|  | Daycare attendance at age 6 or 18 months | |  | Included in the analysis, n (%) |  | Loss to follow-up, n (%) |
| Third survey (at 2.5 y) | | |  |  |  |  |
|  | No |  |  | 34,740 (95.14) |  | 1,774 (4.86) |
|  | Yes |  |  | 6,796 (93.49) |  | 473 (6.51) |
| Fourth survey (at 3.5 y) | | |  |  |  |  |
|  | No |  |  | 34,010 (93.14) |  | 2,504 (6.86) |
|  | Yes |  |  | 6,642 (91.37) |  | 627 (8.63) |
| Fifth survey (at 4.5 y) | | |  |  |  |  |
|  | No |  |  | 32,641 (89.39) |  | 3,873 (10.61) |
|  | Yes |  |  | 6,356 (87.44) |  | 913 (12.56) |
| Sixth survey (at 5.5 y) | | |  |  |  |  |
|  | No |  |  | 31,694 (86.80) |  | 4,820 (13.20) |
|  | Yes |  |  | 6,133 (84.37) |  | 1,136 (15.63) |
| Seventh survey (at 7 y) | | |  |  |  |  |
|  | No |  |  | 30,333 (83.07) |  | 6,181 (16.93) |
|  | Yes |  |  | 5,839 (80.33) |  | 1,430 (19.67) |
| Eighth survey (at 8 y) | | |  |  |  |  |
|  | No |  |  | 29,818 (81.66) |  | 6,696 (18.34) |
|  | Yes |  |  | 5,747 (79.06) |  | 1,522 (20.94) |
| Ninth survey (at 9 y) | | |  |  |  |  |
|  | No |  |  | 29,124 (79.76) |  | 7,390 (20.24) |
|  | Yes |  |  | 5,597 (77.00) |  | 1,672 (23.00) |
| Tenth survey (at 9 y) | | |  |  |  |  |
|  | No |  |  | 28,178 (77.17) |  | 8,336 (22.83) |
|  | Yes |  |  | 5,440 (74.84) |  | 1,829 (25.16) |
| Eleventh survey (at 10 y) | | |  |  |  |  |
|  | No |  |  | 27,243 (74.61) |  | 9,271 (25.39) |
|  | Yes |  |  | 5,197 (71.50) |  | 2,072 (28.50) |
| Twelfth survey (at 11 y) | | |  |  |  |  |
|  | No |  |  | 26,572 (72.77) |  | 9,942 (27.23) |
|  | Yes |  |  | 5,058 (69.58) |  | 2,211 (30.42) |
